# Supplementary material for: Evaluation of community pharmacists’ readiness to implement the Falsified Medicines Directive (Directive 2011/62/EC): an English cross-sectional survey with geospatial analysis
Source: PubMed Central journal article supplement — BMJ Open. 2020 Jan 9;10(1):e033405. doi: 10.1136/bmjopen-2019-033405 (PMC6955531; doi:10.1136/bmjopen-2019-033405), 2020-01-09
Supplement: bmjopen-2019-033405supp003.pdf [file bmjopen-2019-033405supp003.pdf]

**Appendix C\_Deprivation Analysis (geospatial location and Index of Multiple Deprivation (IMD) by decile)**

**Q1 \* Index of Multiple Deprivation Decile Crosstabulation**

**Percent  
ages  
(unadju  
sted  
bases,  
n=102)  
Percent  
ages  
(adju  
sted  
bases)**

|                         |                     | Index of Multiple Deprivation Decile |           |           |           |          |          |           |          |          |          | Total      |             |
|-------------------------|---------------------|--------------------------------------|-----------|-----------|-----------|----------|----------|-----------|----------|----------|----------|------------|-------------|
|                         |                     | 1                                    | 2         | 3         | 4         | 5        | 6        | 7         | 8        | 9        | 10       |            |             |
| 1. What is your gender? | 1 Male              | 7                                    | 7         | 9         | 7         | 3        | 3        | 4         | 2        | 2        | 2        | 46         | 45%         |
|                         | 2 Female            | 10                                   | 8         | 7         | 7         | 1        | 3        | 7         | 3        | 2        | 3        | 51         | 50%         |
|                         | 4 Prefer not to say | 0                                    | 2         | 0         | 1         | 0        | 1        | 0         | 0        | 0        | 1        | 5          | 5%          |
| <b>Total</b>            |                     | <b>17</b>                            | <b>17</b> | <b>16</b> | <b>15</b> | <b>4</b> | <b>7</b> | <b>11</b> | <b>5</b> | <b>4</b> | <b>6</b> | <b>102</b> | <b>100%</b> |

**Q2 \* Index of Multiple Deprivation Decile Crosstabulation**

Count

|                                                                        |  | Index of Multiple Deprivation Decile |           |           |           |          |          |           |          |          |          | Total      |
|------------------------------------------------------------------------|--|--------------------------------------|-----------|-----------|-----------|----------|----------|-----------|----------|----------|----------|------------|
|                                                                        |  | 1                                    | 2         | 3         | 4         | 5        | 6        | 7         | 8        | 9        | 10       |            |
| What type of pharmacy do you work in? 2 Chain<br>(Tick all that apply) |  | 17                                   | 17        | 16        | 15        | 4        | 7        | 11        | 5        | 4        | 5        | 101        |
| <b>Total</b>                                                           |  | <b>17</b>                            | <b>17</b> | <b>16</b> | <b>15</b> | <b>4</b> | <b>7</b> | <b>11</b> | <b>5</b> | <b>4</b> | <b>5</b> | <b>101</b> |

All were invited from a chain,  
so this is 102.

**Q3 \* Index of Multiple Deprivation Decile Crosstabulation**

Count

|                                                          |         | Index of Multiple Deprivation Decile |           |           |           |          |          |           |          |          |          | Total      |             |
|----------------------------------------------------------|---------|--------------------------------------|-----------|-----------|-----------|----------|----------|-----------|----------|----------|----------|------------|-------------|
|                                                          |         | 1                                    | 2         | 3         | 4         | 5        | 6        | 7         | 8        | 9        | 10       |            |             |
| How many years have you been a<br>registered pharmacist? | 0-5 •   | 6                                    | 6         | 5         | 5         | 0        | 4        | 5         | 2        | 1        | 3        | 37         | 36%         |
|                                                          | 6-10 •  | 4                                    | 2         | 5         | 5         | 0        | 3        | 1         | 2        | 1        | 3        | 26         | 25%         |
|                                                          | 11-15 • | 2                                    | 7         | 2         | 2         | 2        | 0        | 2         | 1        | 2        | 0        | 20         | 20%         |
|                                                          | 16-20 • | 0                                    | 1         | 0         | 0         | 0        | 0        | 0         | 0        | 0        | 0        | 1          | 1%          |
|                                                          | 20+ •   | 5                                    | 1         | 4         | 3         | 2        | 0        | 3         | 0        | 0        | 0        | 18         | 18%         |
| <b>Total</b>                                             |         | <b>17</b>                            | <b>17</b> | <b>16</b> | <b>15</b> | <b>4</b> | <b>7</b> | <b>11</b> | <b>5</b> | <b>4</b> | <b>6</b> | <b>102</b> | <b>100%</b> |

**Q4 \* Index of Multiple Deprivation Decile Crosstabulation**

| Count                                                                                |           | Index of Multiple Deprivation Decile |    |    |    |   |   |    |   |   |    | Total |      |     |    |  |
|--------------------------------------------------------------------------------------|-----------|--------------------------------------|----|----|----|---|---|----|---|---|----|-------|------|-----|----|--|
|                                                                                      |           | 1                                    | 2  | 3  | 4  | 5 | 6 | 7  | 8 | 9 | 10 |       |      |     |    |  |
| What are your current working hours per week as a pharmacist (excluding lunch hour)? | 16 – 24 • | 0                                    | 1  | 0  | 2  | 0 | 0 | 0  | 0 | 0 | 0  | 0     | 0    | 3   | 3% |  |
|                                                                                      | 25 - 34 • | 2                                    | 4  | 2  | 1  | 0 | 0 | 0  | 0 | 0 | 0  | 1     | 10   | 10% |    |  |
|                                                                                      | 35 - 44 • | 11                                   | 9  | 12 | 11 | 4 | 7 | 9  | 5 | 4 | 5  | 77    | 75%  |     |    |  |
|                                                                                      | 45 - 54 • | 4                                    | 3  | 2  | 1  | 0 | 0 | 2  | 0 | 0 | 0  | 12    | 12%  |     |    |  |
| Total                                                                                |           | 17                                   | 17 | 16 | 15 | 4 | 7 | 11 | 5 | 4 | 6  | 102   | 100% |     |    |  |

**Q5 \* Index of Multiple Deprivation Decile Crosstabulation**

| Count                                                                                                                                                                                                                                                                                                                                                                             |              | Index of Multiple Deprivation Decile |    |    |    |    |   |   |    |   |    | Total |     |     |
|-----------------------------------------------------------------------------------------------------------------------------------------------------------------------------------------------------------------------------------------------------------------------------------------------------------------------------------------------------------------------------------|--------------|--------------------------------------|----|----|----|----|---|---|----|---|----|-------|-----|-----|
|                                                                                                                                                                                                                                                                                                                                                                                   |              | 1                                    | 2  | 3  | 4  | 5  | 6 | 7 | 8  | 9 | 10 |       |     |     |
| The deadline for full implementation is 9 February 2019. This requires every prescription only medicine and some pharmacy medicines to be scanned at point of dispensing (to check against a central database that they are not falsified, recalled or expired) at community pharmacy level across the EU, before supplying to the patients. How ready are you to implement this? | Not at all • | 5                                    | 6  | 6  | 6  | 0  | 3 | 6 | 2  | 2 | 4  | 40    | 39% | 40% |
|                                                                                                                                                                                                                                                                                                                                                                                   | Not really • | 6                                    | 7  | 4  | 5  | 1  | 1 | 1 | 1  | 1 | 2  | 29    | 28% | 29% |
|                                                                                                                                                                                                                                                                                                                                                                                   | Undecided •  | 3                                    | 1  | 2  | 2  | 2  | 2 | 1 | 1  | 0 | 0  | 14    | 14% | 14% |
|                                                                                                                                                                                                                                                                                                                                                                                   | Somewhat •   | 3                                    | 1  | 2  | 2  | 0  | 1 | 2 | 0  | 1 | 0  | 12    | 12% | 12% |
|                                                                                                                                                                                                                                                                                                                                                                                   | Very much •  | 0                                    | 1  | 1  | 0  | 1  | 0 | 0 | 1  | 0 | 0  | 4     | 4%  | 4%  |
|                                                                                                                                                                                                                                                                                                                                                                                   | Total        |                                      | 17 | 16 | 15 | 15 | 4 | 7 | 10 | 5 | 4  | 6     | 99  | 97% |

**Q6 \* Index of Multiple Deprivation Decile Crosstabulation**

| Count                                                                                                                                                                                                                   |              | Index of Multiple Deprivation Decile |    |    |    |   |   |    |   |   |    | Total |      |  |
|-------------------------------------------------------------------------------------------------------------------------------------------------------------------------------------------------------------------------|--------------|--------------------------------------|----|----|----|---|---|----|---|---|----|-------|------|--|
|                                                                                                                                                                                                                         |              | 1                                    | 2  | 3  | 4  | 5 | 6 | 7  | 8 | 9 | 10 |       |      |  |
| Have you adequate equipment (e.g. computer terminals, scanners, compliance software, include initial set-up, IT, both software and hardware, plus ongoing operational costs.) To enable you to fulfil this requirement? | Not at all • | 2                                    | 2  | 6  | 3  | 0 | 2 | 5  | 0 | 1 | 1  | 22    | 22%  |  |
|                                                                                                                                                                                                                         | Not really • | 5                                    | 7  | 3  | 7  | 0 | 1 | 1  | 1 | 0 | 1  | 26    | 25%  |  |
|                                                                                                                                                                                                                         | Undecided •  | 4                                    | 0  | 1  | 0  | 2 | 1 | 0  | 1 | 1 | 2  | 12    | 12%  |  |
|                                                                                                                                                                                                                         | Somewhat •   | 5                                    | 4  | 4  | 4  | 1 | 2 | 5  | 2 | 2 | 2  | 31    | 30%  |  |
|                                                                                                                                                                                                                         | Very much •  | 1                                    | 4  | 2  | 1  | 1 | 1 | 0  | 1 | 0 | 0  | 11    | 11%  |  |
| Total                                                                                                                                                                                                                   |              | 17                                   | 17 | 16 | 15 | 4 | 7 | 11 | 5 | 4 | 6  | 102   | 100% |  |

**Q7 \* Index of Multiple Deprivation Decile Crosstabulation**

Count

|                                                 |              | Index of Multiple Deprivation Decile |    |    |    |   |   |    |   |   |    | Total |      |  |
|-------------------------------------------------|--------------|--------------------------------------|----|----|----|---|---|----|---|---|----|-------|------|--|
|                                                 |              | 1                                    | 2  | 3  | 4  | 5 | 6 | 7  | 8 | 9 | 10 |       |      |  |
| Q7 How do you see this affecting your workload? | Not at all • | 1                                    | 1  | 1  | 3  | 0 | 1 | 0  | 0 | 0 | 0  | 7     | 7%   |  |
|                                                 | Not really • | 1                                    | 2  | 2  | 1  | 1 | 0 | 0  | 1 | 0 | 2  | 10    | 10%  |  |
|                                                 | Undecided •  | 5                                    | 4  | 3  | 3  | 0 | 0 | 3  | 2 | 2 | 2  | 24    | 24%  |  |
|                                                 | Somewhat •   | 7                                    | 6  | 5  | 6  | 2 | 2 | 4  | 1 | 1 | 1  | 35    | 34%  |  |
|                                                 | Very much •  | 3                                    | 4  | 5  | 2  | 1 | 4 | 4  | 1 | 1 | 1  | 26    | 25%  |  |
| <b>Total</b>                                    |              | 17                                   | 17 | 16 | 15 | 4 | 7 | 11 | 5 | 4 | 6  | 102   | 100% |  |

**Q8 \* Index of Multiple Deprivation Decile Crosstabulation**

Count

|                                                               |                         | Index of Multiple Deprivation Decile |    |    |    |   |   |    |   |   |    | Total |     |      |
|---------------------------------------------------------------|-------------------------|--------------------------------------|----|----|----|---|---|----|---|---|----|-------|-----|------|
|                                                               |                         | 1                                    | 2  | 3  | 4  | 5 | 6 | 7  | 8 | 9 | 10 |       |     |      |
| Q8 How do you see this affecting your business profitability? | Not at all profitable • | 2                                    | 1  | 3  | 1  | 1 | 1 | 0  | 0 | 0 | 1  | 10    | 10% | 10%  |
|                                                               | Not really profitable • | 3                                    | 1  | 1  | 2  | 0 | 1 | 1  | 1 | 3 | 0  | 13    | 13% | 13%  |
|                                                               | Undecided •             | 10                                   | 12 | 10 | 11 | 1 | 4 | 8  | 3 | 1 | 5  | 65    | 64% | 64%  |
|                                                               | Somewhat profitable •   | 1                                    | 2  | 2  | 1  | 1 | 1 | 1  | 0 | 0 | 0  | 9     | 9%  | 9%   |
|                                                               | Very much profitable •  | 1                                    | 1  | 0  | 0  | 1 | 0 | 0  | 1 | 0 | 0  | 4     | 4%  | 4%   |
| <b>Total</b>                                                  |                         | 17                                   | 17 | 16 | 15 | 4 | 7 | 10 | 5 | 4 | 6  | 101   | 99% | 100% |

**Q9 \* Index of Multiple Deprivation Decile Crosstabulation**

Count

|                                                  |                                     | Index of Multiple Deprivation Decile |    |    |    |   |   |   |   |   |    | Total |     |      |
|--------------------------------------------------|-------------------------------------|--------------------------------------|----|----|----|---|---|---|---|---|----|-------|-----|------|
|                                                  |                                     | 1                                    | 2  | 3  | 4  | 5 | 6 | 7 | 8 | 9 | 10 |       |     |      |
| Q9 How do you see this affecting patient safety? | Does not improve patient safety •   | 1                                    | 0  | 0  | 0  | 0 | 0 | 1 | 0 | 1 | 1  | 4     | 4%  | 4%   |
|                                                  | Undecided •                         | 4                                    | 2  | 2  | 1  | 1 | 0 | 2 | 2 | 0 | 0  | 14    | 14% | 14%  |
|                                                  | Somewhat improves patient safety •  | 8                                    | 6  | 8  | 9  | 0 | 3 | 3 | 0 | 1 | 3  | 41    | 40% | 42%  |
|                                                  | Very much improves patient safety • | 4                                    | 8  | 6  | 5  | 3 | 3 | 3 | 3 | 2 | 1  | 38    | 37% | 39%  |
| <b>Total</b>                                     |                                     | 17                                   | 16 | 16 | 15 | 4 | 6 | 9 | 5 | 4 | 5  | 97    | 95% | 100% |

**Q10 \* Index of Multiple Deprivation Decile Crosstabulation**

Count

|                                                                                           |            | Index of Multiple Deprivation Decile |    |    |    |   |   |    |   |   |    | Total |     |      |
|-------------------------------------------------------------------------------------------|------------|--------------------------------------|----|----|----|---|---|----|---|---|----|-------|-----|------|
|                                                                                           |            | 1                                    | 2  | 3  | 4  | 5 | 6 | 7  | 8 | 9 | 10 |       |     |      |
| Q10 In your opinion, what percentage of medicines are believed to be falsified in the UK? | <1% •      | 6                                    | 5  | 7  | 5  | 2 | 1 | 3  | 1 | 1 | 2  | 33    | 32% | 33%  |
|                                                                                           | 1 - 5% •   | 7                                    | 4  | 8  | 6  | 0 | 2 | 4  | 0 | 1 | 1  | 33    | 32% | 33%  |
|                                                                                           | 6 - 10% •  | 2                                    | 3  | 1  | 3  | 1 | 2 | 2  | 2 | 1 | 3  | 20    | 20% | 20%  |
|                                                                                           | 11 - 20% • | 2                                    | 3  | 0  | 1  | 1 | 1 | 2  | 1 | 1 | 0  | 12    | 12% | 12%  |
|                                                                                           | >21% •     | 0                                    | 1  | 0  | 0  | 0 | 1 | 0  | 0 | 0 | 0  | 2     | 2%  | 2%   |
| <b>Total</b>                                                                              |            | 17                                   | 16 | 16 | 15 | 4 | 7 | 11 | 4 | 4 | 6  | 100   | 98% | 100% |

**Q11 \* Index of Multiple Deprivation Decile Crosstabulation**

Count

|                                                                                                       |            | Index of Multiple Deprivation Decile |    |    |    |   |   |    |   |   |    | Total |      |  |
|-------------------------------------------------------------------------------------------------------|------------|--------------------------------------|----|----|----|---|---|----|---|---|----|-------|------|--|
|                                                                                                       |            | 1                                    | 2  | 3  | 4  | 5 | 6 | 7  | 8 | 9 | 10 |       |      |  |
| Q11 In your opinion, what percentage of medicines are believed to be falsified from online suppliers? | 0 – 20% •  | 5                                    | 2  | 6  | 4  | 1 | 1 | 2  | 1 | 0 | 1  | 23    | 23%  |  |
|                                                                                                       | 21 – 40% • | 4                                    | 6  | 3  | 4  | 1 | 1 | 5  | 0 | 1 | 2  | 27    | 26%  |  |
|                                                                                                       | 41 – 60% • | 6                                    | 2  | 6  | 5  | 1 | 3 | 3  | 2 | 1 | 2  | 31    | 30%  |  |
|                                                                                                       | 61 – 80% • | 1                                    | 6  | 1  | 2  | 1 | 0 | 1  | 2 | 2 | 1  | 17    | 17%  |  |
|                                                                                                       | 81-100% •  | 1                                    | 1  | 0  | 0  | 0 | 2 | 0  | 0 | 0 | 0  | 4     | 4%   |  |
| <b>Total</b>                                                                                          |            | 17                                   | 17 | 16 | 15 | 4 | 7 | 11 | 5 | 4 | 6  | 102   | 100% |  |

**Q16 \* Index of Multiple Deprivation Decile Crosstabulation**

Count

|                                                                               |                   | Index of Multiple Deprivation Decile |    |    |    |   |   |    |   |   |    | Total |     |      |
|-------------------------------------------------------------------------------|-------------------|--------------------------------------|----|----|----|---|---|----|---|---|----|-------|-----|------|
|                                                                               |                   | 1                                    | 2  | 3  | 4  | 5 | 6 | 7  | 8 | 9 | 10 |       |     |      |
| Q16 Falsified medicines pose a significant problem to the pharmacy profession | Strongly Disagree | 0                                    | 0  | 0  | 1  | 0 | 0 | 1  | 0 | 0 | 1  | 3     | 3%  | 3%   |
|                                                                               | Disagree          | 0                                    | 2  | 4  | 1  | 0 | 1 | 1  | 1 | 0 | 0  | 10    | 10% | 10%  |
|                                                                               | Uncertain         | 1                                    | 3  | 4  | 1  | 0 | 1 | 2  | 2 | 0 | 1  | 15    | 15% | 15%  |
|                                                                               | Agree             | 11                                   | 4  | 4  | 8  | 2 | 1 | 3  | 1 | 4 | 2  | 40    | 39% | 40%  |
|                                                                               | Strongly Agree    | 5                                    | 8  | 4  | 4  | 2 | 4 | 3  | 1 | 0 | 2  | 33    | 32% | 33%  |
| <b>Total</b>                                                                  |                   | 17                                   | 17 | 16 | 15 | 4 | 7 | 10 | 5 | 4 | 6  | 101   | 99% | 100% |

**Q17 \* Index of Multiple Deprivation Decile Crosstabulation**

Count

|                                                                                      |                | Index of Multiple Deprivation Decile |    |    |    |   |   |    |   |   |    | Total |     |      |
|--------------------------------------------------------------------------------------|----------------|--------------------------------------|----|----|----|---|---|----|---|---|----|-------|-----|------|
|                                                                                      |                | 1                                    | 2  | 3  | 4  | 5 | 6 | 7  | 8 | 9 | 10 |       |     |      |
| Q17 Lack of knowledge is a barrier for detecting the presence of falsified medicines | Disagree       | 0                                    | 3  | 2  | 0  | 0 | 0 | 0  | 0 | 0 | 0  | 5     | 5%  | 5%   |
|                                                                                      | Uncertain      | 2                                    | 1  | 2  | 0  | 0 | 0 | 2  | 0 | 0 | 1  | 8     | 8%  | 8%   |
|                                                                                      | Agree          | 11                                   | 7  | 11 | 11 | 2 | 4 | 4  | 4 | 2 | 2  | 58    | 57% | 57%  |
|                                                                                      | Strongly Agree | 4                                    | 6  | 1  | 4  | 2 | 3 | 4  | 1 | 2 | 3  | 30    | 29% | 30%  |
| <b>Total</b>                                                                         |                | 17                                   | 17 | 16 | 15 | 4 | 7 | 10 | 5 | 4 | 6  | 101   | 99% | 100% |

**Q18 \* Index of Multiple Deprivation Decile Crosstabulation**

Count

|                                                                                      |                | Index of Multiple Deprivation Decile |    |    |    |   |   |    |   |   |    | Total |     |      |
|--------------------------------------------------------------------------------------|----------------|--------------------------------------|----|----|----|---|---|----|---|---|----|-------|-----|------|
|                                                                                      |                | 1                                    | 2  | 3  | 4  | 5 | 6 | 7  | 8 | 9 | 10 |       |     |      |
| Q18 Lack of resources is a barrier for detecting the presence of falsified medicines | Disagree       | 0                                    | 1  | 4  | 1  | 1 | 0 | 0  | 0 | 0 | 0  | 7     | 7%  | 7%   |
|                                                                                      | Uncertain      | 2                                    | 2  | 0  | 2  | 0 | 0 | 0  | 0 | 0 | 1  | 7     | 7%  | 7%   |
|                                                                                      | Agree          | 11                                   | 6  | 11 | 7  | 0 | 5 | 6  | 4 | 2 | 4  | 56    | 55% | 55%  |
|                                                                                      | Strongly Agree | 4                                    | 8  | 1  | 5  | 3 | 2 | 4  | 1 | 2 | 1  | 31    | 30% | 31%  |
| <b>Total</b>                                                                         |                | 17                                   | 17 | 16 | 15 | 4 | 7 | 10 | 5 | 4 | 6  | 101   | 99% | 100% |

**Q19 \* Index of Multiple Deprivation Decile Crosstabulation**

Count

|                                                                                                 |                   | Index of Multiple Deprivation Decile |    |    |    |   |   |    |   |   |    | Total |     |      |
|-------------------------------------------------------------------------------------------------|-------------------|--------------------------------------|----|----|----|---|---|----|---|---|----|-------|-----|------|
|                                                                                                 |                   | 1                                    | 2  | 3  | 4  | 5 | 6 | 7  | 8 | 9 | 10 |       |     |      |
| Q19 The dispensing pharmacist retains highest liability when falsified medicines reach patients | Strongly Disagree | 2                                    | 1  | 0  | 1  | 0 | 0 | 1  | 0 | 0 | 1  | 6     | 6%  | 6%   |
|                                                                                                 | Disagree          | 4                                    | 4  | 3  | 5  | 0 | 3 | 1  | 1 | 2 | 1  | 24    | 24% | 24%  |
|                                                                                                 | Uncertain         | 5                                    | 3  | 4  | 3  | 0 | 1 | 1  | 1 | 0 | 2  | 20    | 20% | 20%  |
|                                                                                                 | Agree             | 2                                    | 5  | 4  | 4  | 1 | 1 | 3  | 1 | 0 | 1  | 22    | 22% | 22%  |
|                                                                                                 | Strongly Agree    | 4                                    | 4  | 5  | 2  | 3 | 2 | 4  | 2 | 2 | 1  | 29    | 28% | 29%  |
| <b>Total</b>                                                                                    |                   | 17                                   | 17 | 16 | 15 | 4 | 7 | 10 | 5 | 4 | 6  | 101   | 99% | 100% |

**Q20 \* Index of Multiple Deprivation Decile Crosstabulation**

Count

|                                                                                                      |                   | Index of Multiple Deprivation Decile |    |    |    |   |   |    |   |   |    | Total |     |      |
|------------------------------------------------------------------------------------------------------|-------------------|--------------------------------------|----|----|----|---|---|----|---|---|----|-------|-----|------|
|                                                                                                      |                   | 1                                    | 2  | 3  | 4  | 5 | 6 | 7  | 8 | 9 | 10 |       |     |      |
| Q20 A pharmacist's intervention can prevent or disrupt the supply of falsified medicines to patients | Strongly Disagree | 0                                    | 0  | 0  | 0  | 0 | 0 | 0  | 0 | 0 | 1  | 1     | 1%  | 1%   |
|                                                                                                      | Disagree          | 0                                    | 2  | 0  | 0  | 0 | 0 | 0  | 0 | 1 | 0  | 3     | 3%  | 3%   |
|                                                                                                      | Uncertain         | 3                                    | 1  | 0  | 3  | 0 | 0 | 2  | 1 | 0 | 2  | 12    | 12% | 12%  |
|                                                                                                      | Agree             | 10                                   | 7  | 13 | 10 | 2 | 4 | 3  | 3 | 1 | 1  | 54    | 53% | 54%  |
|                                                                                                      | Strongly Agree    | 4                                    | 7  | 3  | 2  | 2 | 2 | 5  | 1 | 2 | 2  | 30    | 29% | 30%  |
| <b>Total</b>                                                                                         |                   | 17                                   | 17 | 16 | 15 | 4 | 6 | 10 | 5 | 4 | 6  | 100   | 98% | 100% |

**Q21 \* Index of Multiple Deprivation Decile Crosstabulation**

Count

|                                                                                      |                   | Index of Multiple Deprivation Decile |    |    |    |   |   |    |   |   |    | Total |     |      |
|--------------------------------------------------------------------------------------|-------------------|--------------------------------------|----|----|----|---|---|----|---|---|----|-------|-----|------|
|                                                                                      |                   | 1                                    | 2  | 3  | 4  | 5 | 6 | 7  | 8 | 9 | 10 |       |     |      |
| Q21 Training courses can improve pharmacists knowledge regarding falsified medicines | Strongly Disagree | 0                                    | 0  | 0  | 0  | 0 | 0 | 0  | 0 | 0 | 1  | 1     | 1%  | 1%   |
|                                                                                      | Disagree          | 0                                    | 0  | 1  | 0  | 0 | 0 | 0  | 0 | 0 | 0  | 1     | 1%  | 1%   |
|                                                                                      | Uncertain         | 1                                    | 1  | 4  | 1  | 0 | 0 | 3  | 0 | 1 | 0  | 11    | 11% | 11%  |
|                                                                                      | Agree             | 11                                   | 7  | 8  | 9  | 1 | 3 | 2  | 3 | 2 | 2  | 48    | 47% | 48%  |
|                                                                                      | Strongly Agree    | 5                                    | 9  | 3  | 5  | 3 | 4 | 5  | 2 | 1 | 3  | 40    | 39% | 40%  |
| <b>Total</b>                                                                         |                   | 17                                   | 17 | 16 | 15 | 4 | 7 | 10 | 5 | 4 | 6  | 101   | 99% | 100% |

**Q22 \* Index of Multiple Deprivation Decile Crosstabulation**

Count

|                                                                   |                   | Index of Multiple Deprivation Decile |    |    |    |   |   |    |   |   |    | Total |     |      |
|-------------------------------------------------------------------|-------------------|--------------------------------------|----|----|----|---|---|----|---|---|----|-------|-----|------|
|                                                                   |                   | 1                                    | 2  | 3  | 4  | 5 | 6 | 7  | 8 | 9 | 10 |       |     |      |
| Q22 Listening to patients could help identify falsified medicines | Strongly Disagree | 0                                    | 1  | 1  | 0  | 0 | 0 | 0  | 0 | 0 | 0  | 2     | 2%  | 2%   |
|                                                                   | Disagree          | 3                                    | 2  | 4  | 3  | 0 | 0 | 1  | 0 | 1 | 1  | 15    | 15% | 15%  |
|                                                                   | Uncertain         | 4                                    | 6  | 3  | 3  | 1 | 2 | 5  | 2 | 2 | 3  | 31    | 30% | 31%  |
|                                                                   | Agree             | 8                                    | 2  | 7  | 6  | 0 | 3 | 2  | 2 | 1 | 1  | 32    | 31% | 32%  |
|                                                                   | Strongly Agree    | 2                                    | 6  | 1  | 3  | 3 | 2 | 2  | 1 | 0 | 1  | 21    | 21% | 21%  |
| <b>Total</b>                                                      |                   | 17                                   | 17 | 16 | 15 | 4 | 7 | 10 | 5 | 4 | 6  | 101   | 99% | 100% |

**Q23 \* Index of Multiple Deprivation Decile Crosstabulation**

Count

|                                                                                                 |                   | Index of Multiple Deprivation Decile |    |    |    |   |   |    |   |   |    | Total |     |      |
|-------------------------------------------------------------------------------------------------|-------------------|--------------------------------------|----|----|----|---|---|----|---|---|----|-------|-----|------|
|                                                                                                 |                   | 1                                    | 2  | 3  | 4  | 5 | 6 | 7  | 8 | 9 | 10 |       |     |      |
| Q23 The majority of my fellow pharmacists in the UK are confident regarding falsified medicines | Strongly Disagree | 2                                    | 1  | 3  | 3  | 0 | 3 | 1  | 0 | 2 | 3  | 18    | 18% | 18%  |
|                                                                                                 | Disagree          | 7                                    | 7  | 4  | 7  | 3 | 2 | 6  | 4 | 2 | 1  | 43    | 42% | 43%  |
|                                                                                                 | Uncertain         | 6                                    | 9  | 7  | 3  | 1 | 2 | 2  | 1 | 0 | 2  | 33    | 32% | 33%  |
|                                                                                                 | Agree             | 2                                    | 0  | 1  | 1  | 0 | 0 | 0  | 0 | 0 | 0  | 4     | 4%  | 4%   |
|                                                                                                 | Strongly Agree    | 0                                    | 0  | 1  | 1  | 0 | 0 | 1  | 0 | 0 | 0  | 3     | 3%  | 3%   |
| <b>Total</b>                                                                                    |                   | 17                                   | 17 | 16 | 15 | 4 | 7 | 10 | 5 | 4 | 6  | 101   | 99% | 100% |

**Q24 \* Index of Multiple Deprivation Decile Crosstabulation**

Count

|                                                                  |                   | Index of Multiple Deprivation Decile |    |    |    |   |   |    |   |   |    | Total |     |      |
|------------------------------------------------------------------|-------------------|--------------------------------------|----|----|----|---|---|----|---|---|----|-------|-----|------|
|                                                                  |                   | 1                                    | 2  | 3  | 4  | 5 | 6 | 7  | 8 | 9 | 10 |       |     |      |
| Q24 I'm confident and capable in identifying falsified medicines | Strongly Disagree | 2                                    | 2  | 3  | 0  | 1 | 3 | 2  | 0 | 2 | 3  | 18    | 18% | 18%  |
|                                                                  | Disagree          | 5                                    | 8  | 4  | 7  | 2 | 2 | 3  | 4 | 2 | 1  | 38    | 37% | 38%  |
|                                                                  | Uncertain         | 9                                    | 7  | 1  | 4  | 0 | 2 | 3  | 1 | 0 | 2  | 29    | 28% | 29%  |
|                                                                  | Agree             | 1                                    | 0  | 8  | 3  | 1 | 0 | 1  | 0 | 0 | 0  | 14    | 14% | 14%  |
|                                                                  | Strongly Agree    | 0                                    | 0  | 0  | 1  | 0 | 0 | 1  | 0 | 0 | 0  | 2     | 2%  | 2%   |
| <b>Total</b>                                                     |                   | 17                                   | 17 | 16 | 15 | 4 | 7 | 10 | 5 | 4 | 6  | 101   | 99% | 100% |

**Q25 \* Index of Multiple Deprivation Decile Crosstabulation**

Count

|                                                                                             |                   | Index of Multiple Deprivation Decile |    |    |    |   |   |    |   |   |    | Total |     |      |
|---------------------------------------------------------------------------------------------|-------------------|--------------------------------------|----|----|----|---|---|----|---|---|----|-------|-----|------|
|                                                                                             |                   | 1                                    | 2  | 3  | 4  | 5 | 6 | 7  | 8 | 9 | 10 |       |     |      |
| Q25 I'm constantly vigilant of encountering falsified medicines when checking prescriptions | Strongly Disagree | 0                                    | 1  | 1  | 2  | 0 | 2 | 1  | 1 | 1 | 3  | 12    | 12% | 12%  |
|                                                                                             | Disagree          | 8                                    | 5  | 5  | 6  | 1 | 1 | 5  | 1 | 3 | 1  | 36    | 35% | 36%  |
|                                                                                             | Uncertain         | 3                                    | 6  | 4  | 2  | 1 | 2 | 2  | 2 | 0 | 0  | 22    | 22% | 22%  |
|                                                                                             | Agree             | 5                                    | 4  | 6  | 4  | 1 | 1 | 1  | 1 | 0 | 2  | 25    | 25% | 25%  |
|                                                                                             | Strongly Agree    | 1                                    | 1  | 0  | 1  | 1 | 1 | 1  | 0 | 0 | 0  | 6     | 6%  | 6%   |
| <b>Total</b>                                                                                |                   | 17                                   | 17 | 16 | 15 | 4 | 7 | 10 | 5 | 4 | 6  | 101   | 99% | 100% |

**Q26 \* Index of Multiple Deprivation Decile Crosstabulation**

Count

|                                                             |                   | Index of Multiple Deprivation Decile |    |    |    |   |   |    |   |   |    | Total |     |      |
|-------------------------------------------------------------|-------------------|--------------------------------------|----|----|----|---|---|----|---|---|----|-------|-----|------|
|                                                             |                   | 1                                    | 2  | 3  | 4  | 5 | 6 | 7  | 8 | 9 | 10 |       |     |      |
| Q26 I have enough knowledge to identify falsified medicines | Strongly Disagree | 1                                    | 2  | 3  | 2  | 1 | 3 | 1  | 1 | 2 | 3  | 19    | 19% | 19%  |
|                                                             | Disagree          | 9                                    | 7  | 5  | 5  | 1 | 2 | 5  | 2 | 2 | 1  | 39    | 38% | 39%  |
|                                                             | Uncertain         | 5                                    | 7  | 5  | 4  | 1 | 2 | 3  | 2 | 0 | 2  | 31    | 30% | 31%  |
|                                                             | Agree             | 2                                    | 1  | 3  | 3  | 1 | 0 | 0  | 0 | 0 | 0  | 10    | 10% | 10%  |
|                                                             | Strongly Agree    | 0                                    | 0  | 0  | 1  | 0 | 0 | 1  | 0 | 0 | 0  | 2     | 2%  | 2%   |
| <b>Total</b>                                                |                   | 17                                   | 17 | 16 | 15 | 4 | 7 | 10 | 5 | 4 | 6  | 101   | 99% | 100% |

**Q27a \* Index of Multiple Deprivation Decile Crosstabulation**

Count

|                                                                              |     | Index of Multiple Deprivation Decile |    |    |    |   |   |   |   |   |    | Total |     |      |
|------------------------------------------------------------------------------|-----|--------------------------------------|----|----|----|---|---|---|---|---|----|-------|-----|------|
|                                                                              |     | 1                                    | 2  | 3  | 4  | 5 | 6 | 7 | 8 | 9 | 10 |       |     |      |
| Q27a) Have you been involved in any campaigns regarding falsified medicines? | Yes | 0                                    | 0  | 1  | 0  | 1 | 0 | 0 | 0 | 0 | 0  | 2     | 2%  | 2%   |
|                                                                              | No  | 16                                   | 17 | 12 | 13 | 3 | 6 | 8 | 5 | 3 | 6  | 89    | 87% | 98%  |
| Total                                                                        |     | 16                                   | 17 | 13 | 13 | 4 | 6 | 8 | 5 | 3 | 6  | 91    | 89% | 100% |

**Q27c \* Index of Multiple Deprivation Decile Crosstabulation**

Count

|                                                    |     | Index of Multiple Deprivation Decile |    |   |   |   |   |   |   |   |    | Total |     |      |
|----------------------------------------------------|-----|--------------------------------------|----|---|---|---|---|---|---|---|----|-------|-----|------|
|                                                    |     | 1                                    | 2  | 3 | 4 | 5 | 6 | 7 | 8 | 9 | 10 |       |     |      |
| Q27c) Do you believe that campaigns was effective? | Yes | 2                                    | 2  | 1 | 1 | 0 | 1 | 0 | 0 | 0 | 1  | 8     | 8%  | 16%  |
|                                                    | No  | 8                                    | 8  | 5 | 5 | 3 | 1 | 5 | 2 | 3 | 2  | 42    | 41% | 84%  |
| Total                                              |     | 10                                   | 10 | 6 | 6 | 3 | 2 | 5 | 2 | 3 | 3  | 50    | 49% | 100% |

**Q28a \* Index of Multiple Deprivation Decile Crosstabulation**

Count

|                                                                          |     | Index of Multiple Deprivation Decile |    |    |    |   |   |   |   |   |    | Total |     |      |
|--------------------------------------------------------------------------|-----|--------------------------------------|----|----|----|---|---|---|---|---|----|-------|-----|------|
|                                                                          |     | 1                                    | 2  | 3  | 4  | 5 | 6 | 7 | 8 | 9 | 10 |       |     |      |
| Q28a) Have you ever used the Yellow Card Scheme for falsified medicines? | Yes | 1                                    | 2  | 0  | 1  | 0 | 0 | 1 | 1 | 0 | 0  | 6     | 6%  | 7%   |
|                                                                          | No  | 14                                   | 15 | 13 | 12 | 4 | 6 | 7 | 4 | 3 | 6  | 84    | 82% | 93%  |
| Total                                                                    |     | 15                                   | 17 | 13 | 13 | 4 | 6 | 8 | 5 | 3 | 6  | 90    | 88% | 100% |

**Q28b \* Index of Multiple Deprivation Decile Crosstabulation**

Count

|                                                                               |     | Index of Multiple Deprivation Decile |    |   |    |   |   |   |   |   |    | Total |     |      |
|-------------------------------------------------------------------------------|-----|--------------------------------------|----|---|----|---|---|---|---|---|----|-------|-----|------|
|                                                                               |     | 1                                    | 2  | 3 | 4  | 5 | 6 | 7 | 8 | 9 | 10 |       |     |      |
| Q28 b) Do you believe this scheme is useful in combating falsified medicines? | Yes | 7                                    | 7  | 4 | 5  | 2 | 3 | 4 | 2 | 1 | 2  | 37    | 36% | 52%  |
|                                                                               | No  | 6                                    | 5  | 4 | 7  | 2 | 1 | 4 | 1 | 2 | 2  | 34    | 33% | 48%  |
| Total                                                                         |     | 13                                   | 12 | 8 | 12 | 4 | 4 | 8 | 3 | 3 | 4  | 71    | 70% | 100% |

**Q29 \* Index of Multiple Deprivation Decile Crosstabulation**

Count

|                                                                 |     | Index of Multiple Deprivation Decile |    |    |    |   |   |   |   |   |    | Total |     |      |
|-----------------------------------------------------------------|-----|--------------------------------------|----|----|----|---|---|---|---|---|----|-------|-----|------|
|                                                                 |     | 1                                    | 2  | 3  | 4  | 5 | 6 | 7 | 8 | 9 | 10 |       |     |      |
| Q29 Have you seen the 'Postcard Guidance for Patients' leaflet? | Yes | 1                                    | 0  | 0  | 1  | 0 | 1 | 0 | 0 | 0 | 0  | 3     | 3%  | 3%   |
|                                                                 | No  | 15                                   | 17 | 13 | 12 | 4 | 5 | 8 | 5 | 3 | 6  | 88    | 86% | 97%  |
| Total                                                           |     | 16                                   | 17 | 13 | 13 | 4 | 6 | 8 | 5 | 3 | 6  | 91    | 89% | 100% |

**Q30a \* Index of Multiple Deprivation Decile Crosstabulation**

Count

|                                                                                   |     | Index of Multiple Deprivation Decile |    |    |    |   |   |   |   |   |    | Total |     |      |
|-----------------------------------------------------------------------------------|-----|--------------------------------------|----|----|----|---|---|---|---|---|----|-------|-----|------|
|                                                                                   |     | 1                                    | 2  | 3  | 4  | 5 | 6 | 7 | 8 | 9 | 10 |       |     |      |
| Q30a) Are you aware of any technologies in place to identify falsified medicines? | Yes | 1                                    | 2  | 3  | 3  | 0 | 1 | 3 | 0 | 1 | 0  | 14    | 14% | 16%  |
|                                                                                   | No  | 14                                   | 15 | 10 | 10 | 4 | 5 | 5 | 5 | 2 | 6  | 76    | 75% | 84%  |
| Total                                                                             |     | 15                                   | 17 | 13 | 13 | 4 | 6 | 8 | 5 | 3 | 6  | 90    | 88% | 100% |

**Q30c \* Index of Multiple Deprivation Decile Crosstabulation**

Count

|                                                                                            |     | Index of Multiple Deprivation Decile |    |   |    |   |   |   |   |   |    | Total |     |      |
|--------------------------------------------------------------------------------------------|-----|--------------------------------------|----|---|----|---|---|---|---|---|----|-------|-----|------|
|                                                                                            |     | 1                                    | 2  | 3 | 4  | 5 | 6 | 7 | 8 | 9 | 10 |       |     |      |
| Q30 c) Do you believe this technology would be effective in combating falsified medicines? | Yes | 6                                    | 6  | 4 | 7  | 1 | 3 | 3 | 2 | 2 | 2  | 36    | 35% | 56%  |
|                                                                                            | No  | 4                                    | 5  | 4 | 6  | 3 | 0 | 4 | 0 | 1 | 1  | 28    | 27% | 44%  |
| Total                                                                                      |     | 10                                   | 11 | 8 | 13 | 4 | 3 | 7 | 2 | 3 | 3  | 64    | 63% | 100% |

**Q31a \* Index of Multiple Deprivation Decile Crosstabulation**

Count

|                                                                            |     | Index of Multiple Deprivation Decile |    |    |    |   |   |   |   |   |    | Total |     |      |
|----------------------------------------------------------------------------|-----|--------------------------------------|----|----|----|---|---|---|---|---|----|-------|-----|------|
|                                                                            |     | 1                                    | 2  | 3  | 4  | 5 | 6 | 7 | 8 | 9 | 10 |       |     |      |
| Q31. a) Have you ever received any training regarding falsified medicines? | Yes | 1                                    | 0  | 1  | 1  | 0 | 0 | 0 | 0 | 0 | 0  | 3     | 3%  | 3%   |
|                                                                            | No  | 15                                   | 17 | 12 | 12 | 4 | 6 | 8 | 5 | 3 | 6  | 88    | 86% | 97%  |
| Total                                                                      |     | 16                                   | 17 | 13 | 13 | 4 | 6 | 8 | 5 | 3 | 6  | 91    | 89% | 100% |

**Q31b \* Index of Multiple Deprivation Decile Crosstabulation**

Count

|                                                                                    |     | Index of Multiple Deprivation Decile |    |    |    |   |   |   |   |   |    | Total |     |      |
|------------------------------------------------------------------------------------|-----|--------------------------------------|----|----|----|---|---|---|---|---|----|-------|-----|------|
|                                                                                    |     | 1                                    | 2  | 3  | 4  | 5 | 6 | 7 | 8 | 9 | 10 |       |     |      |
| Q31. b) Would you participate in a training program regarding falsified medicines? | Yes | 11                                   | 13 | 10 | 11 | 3 | 6 | 6 | 4 | 3 | 3  | 70    | 69% | 83%  |
|                                                                                    | No  | 3                                    | 2  | 2  | 0  | 1 | 0 | 2 | 1 | 0 | 2  | 13    | 13% | 15%  |
| Total                                                                              |     | 14                                   | 15 | 12 | 12 | 4 | 6 | 8 | 5 | 3 | 5  | 84    | 82% | 100% |

**Q32a \* Index of Multiple Deprivation Decile Crosstabulation**

Count

Index of Multiple Deprivation Decile



|                                                       |     | 1  | 2  | 3  | 4  | 5 | 6 | 7 | 8 | 9 | 10 | Total |     |      |
|-------------------------------------------------------|-----|----|----|----|----|---|---|---|---|---|----|-------|-----|------|
| Q32. a) Have you ever identified falsified medicines? | Yes | 2  | 1  | 1  | 0  | 0 | 0 | 1 | 0 | 0 | 0  | 5     | 5%  | 5%   |
|                                                       | No  | 14 | 16 | 12 | 13 | 4 | 6 | 7 | 5 | 3 | 6  | 86    | 84% | 95%  |
| Total                                                 |     | 16 | 17 | 13 | 13 | 4 | 6 | 8 | 5 | 3 | 6  | 91    | 89% | 100% |

**Q32b \* Index of Multiple Deprivation Decile Crosstabulation**

Count

|                                                                       |     | Index of Multiple Deprivation Decile |   |   |   |   |   |   |   |   |    | Total |     |      |
|-----------------------------------------------------------------------|-----|--------------------------------------|---|---|---|---|---|---|---|---|----|-------|-----|------|
|                                                                       |     | 1                                    | 2 | 3 | 4 | 5 | 6 | 7 | 8 | 9 | 10 | Total |     |      |
| Q32 b) Did you inform the MHRA if you identified falsified medicines? | Yes | 2                                    | 0 | 0 | 0 | 0 | 0 | 1 | 0 | 0 | 0  | 3     | 3%  | 6%   |
|                                                                       | No  | 8                                    | 9 | 6 | 7 | 4 | 2 | 6 | 2 | 3 | 2  | 49    | 48% | 94%  |
| Total                                                                 |     | 10                                   | 9 | 6 | 7 | 4 | 2 | 7 | 2 | 3 | 2  | 52    | 51% | 100% |

**Q33a \* Index of Multiple Deprivation Decile Crosstabulation**

Count

|                                                                                  |     | Index of Multiple Deprivation Decile |    |    |    |   |   |   |   |   |    | Total |     |      |
|----------------------------------------------------------------------------------|-----|--------------------------------------|----|----|----|---|---|---|---|---|----|-------|-----|------|
|                                                                                  |     | 1                                    | 2  | 3  | 4  | 5 | 6 | 7 | 8 | 9 | 10 | Total |     |      |
| Q33. a) Do you keep any records when encountering potential falsified medicines? | Yes | 7                                    | 3  | 1  | 3  | 2 | 0 | 2 | 1 | 1 | 1  | 21    | 21% | 27%  |
|                                                                                  | No  | 6                                    | 11 | 9  | 9  | 2 | 5 | 6 | 3 | 2 | 3  | 56    | 55% | 73%  |
| Total                                                                            |     | 13                                   | 14 | 10 | 12 | 4 | 5 | 8 | 4 | 3 | 4  | 77    | 75% | 100% |
